# Supplementary material for: Outcomes of chemotherapy/chemoradiation vs. R2 surgical debulking vs. palliative care in nonresectable locally recurrent rectal cancer
Source: PubMed Central journal article supplement (PMC11459869; doi:10.1177/03008916241253130), 2024-05-10
Supplement: sj-pdf-1-tmj-10.1177_03008916241253130.pdf [file sj-pdf-1-tmj-10.1177_03008916241253130.pdf]

## Outcomes of chemotherapy/chemoradiation vs. R2 surgical debulking vs. palliative care in non-resectable locally recurrent rectal cancer

Luca Sorrentino<sup>a\*#</sup>, MD, Andrea Scardino<sup>a#</sup>, MD, Luigi Battaglia<sup>a</sup>, MD, Raffaella Vigorito<sup>b</sup>, MD, Giovanna Sabella<sup>c</sup>, MD, Filippo Patti<sup>d</sup>, MD, Michele Prisciandaro<sup>e</sup>, MD, PhD, Elena Daveri<sup>f</sup>, PhD, Alessandro Gronchi<sup>g</sup>, MD, Filiberto Belli<sup>\*a</sup>, MD, Marcello Guaglio<sup>a</sup>, MD

<sup>a</sup>Colorectal Surgery Unit, Fondazione IRCCS Istituto Nazionale dei Tumori, Milan, Italy

<sup>b</sup>Department of Radiology, Fondazione IRCCS Istituto Nazionale dei Tumori, Milan, Italy

<sup>c</sup>1<sup>st</sup> Pathology Division, Fondazione IRCCS Istituto Nazionale dei Tumori, Milan, Italy

<sup>d</sup>Radiation Oncology Unit, Fondazione IRCCS Istituto Nazionale dei Tumori, Milan, Italy

<sup>e</sup>Department of Medical Oncology, Fondazione IRCCS Istituto Nazionale dei Tumori, Milan, Italy

<sup>f</sup>Translational Immunology Unit, Fondazione IRCCS Istituto Nazionale dei Tumori, Milan, Italy

<sup>g</sup>Sarcoma Surgery Unit, Fondazione IRCCS Istituto Nazionale dei Tumori, Milan, Italy

### Supplementary Tables

**Supplementary Table S1.** Univariate and multivariate analyses for overall survival

|                                            | Univariate analysis |            |         | Multivariate analysis |           |         |
|--------------------------------------------|---------------------|------------|---------|-----------------------|-----------|---------|
|                                            | HR                  | 95%CI      | P value | HR                    | 95%CI     | P value |
| <b>Time to local recurrence</b>            | 1.00                | 0.98-1.01  | 0.446   | -                     | -         | -       |
| <b>CEA</b>                                 | 1.00                | 0.99-1.01  | 0.291   | -                     | -         | -       |
| <b>CA19.9</b>                              | 1.01                | 1.00-1.01  | 0.14    | 1.01                  | 0.99-1.01 | 0.245   |
| <b>Size on MRI</b>                         | 1.00                | 0.98-1.02  | 0.964   | -                     | -         | -       |
| <b>Synchronous distant metastases</b>      | 1.21                | 0.45-2.77  | 0.676   | 1.49                  | 0.43-4.48 | 0.495   |
| <b>Pelvic localization of LRRC</b>         |                     |            |         |                       |           |         |
| S1a-b-c                                    | (ref)               | (ref)      | (ref)   | (ref)                 | (ref)     | (ref)   |
| S2a-b                                      | 0.52                | 0.19-1.29  | 0.168   | 0.64                  | 0.19-2.03 | 0.447   |
| S3                                         | 0.55                | 0.245-1.25 | 0.149   | 0.68                  | 0.23-1.88 | 0.465   |
| <b>Therapeutic approach</b>                |                     |            |         |                       |           |         |
| Chemotherapy ± radiotherapy                | 0.13                | 0.05-0.37  | <0.001  | 0.19                  | 0.06-0.61 | 0.003   |
| Debulking ± chemotherapy ± radiotherapy    | 0.15                | 0.05-0.45  | <0.001  | 0.15                  | 0.04-0.55 | 0.004   |
| No treatment                               | (ref)               | (ref)      | (ref)   | (ref)                 | (ref)     | (ref)   |
| <b>KRAS status (mutated vs. wild-type)</b> | 1.90                | 0.75-4.77  | 0.167   | -                     | -         | -       |
| <b>Previous systemic chemotherapy</b>      | 2.36                | 1.01-6.16  | 0.059   | -                     | -         | -       |
